# Supplementary material for: Fabrication of an immunosensor for quantitative detection of breast cancer biomarker UBE2C
Source: PubMed Central journal article supplement — RSC Adv. 2019 May 29;9(29):16738–45. doi: 10.1039/c8ra10245g (PMC9064433; doi:10.1039/c8ra10245g), 2019-05-29
Supplement: RA-009-C8RA10245G-s001.pdf [file RA-009-C8RA10245G-s001.pdf]

## Supplementary Information

### **Fabrication of an immunosensor for quantitative detection of breast cancer biomarker UBE2C**

VSPK Sankara Aditya Jayanthi, Asim Bikas Das, Urmila Saxena\*

Department of Biotechnology, National Institute of Technology Warangal, Warangal-506004, Telangana, India

#### **\*Corresponding author**

Dr. Urmila Saxena

Assistant Professor

Department of Biotechnology

National Institute of Technology Warangal

Warangal-506004,

Telangana, India

Mob: +91-8332969442

Email: [urmila.saxena@gmail.com](mailto:urmila.saxena@gmail.com), [urmila@nitw.ac.in](mailto:urmila@nitw.ac.in)

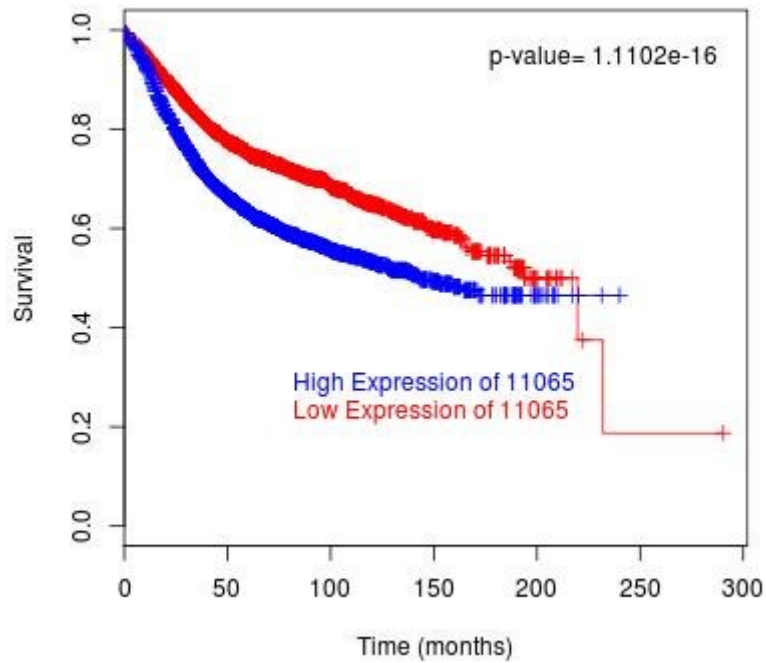

**Figure S1.** Survival analysis of breast cancer patients with respect to the expression of UBE2C. (n = 4640, Hazard ratio = 1.515,  $P=1.11e^{-16}$ ). Blue and red line represents the high and low expression groups respectively. Higher expression of UBEC is associated with lower patient survival compared to the lower expression.

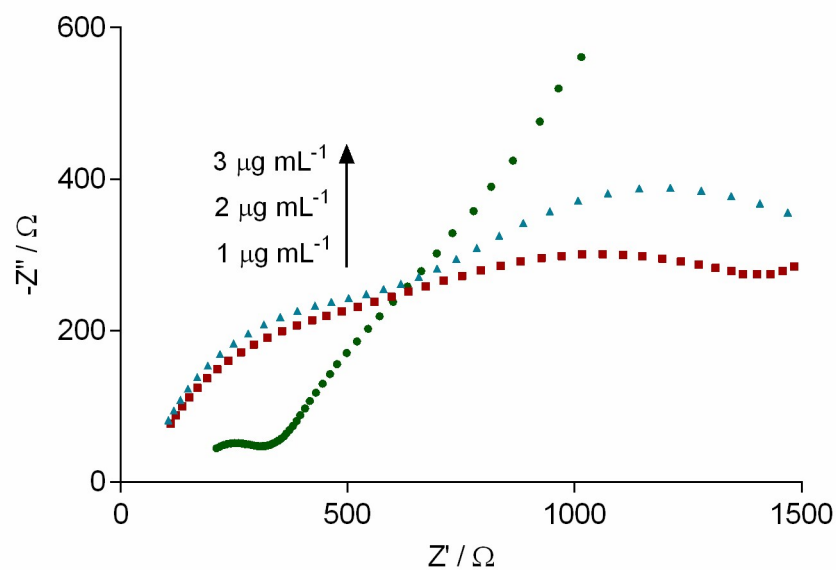

**Figure S2.** A) Electrochemical impedance spectra obtained towards UBE2C with immunosensors fabricated with varying concentrations of anti-UBE2C antibodies ( $1$ ,  $2$ , and  $3 \mu\text{g mL}^{-1}$ ). EIS measurements were carried out with an alternating wave of  $10 \text{ mV}$  amplitude in the frequency range between  $10,000$  and  $0.05 \text{ Hz}$ . in  $0.1 \text{ M PBS}$  ( $\text{pH } 7.4$ ) with  $5.0 \text{ mM } [\text{K}_3\text{Fe}(\text{CN})_6/\text{K}_4\text{Fe}(\text{CN})_6]$  and  $0.1 \text{ M KCl}$ .

A) GCE

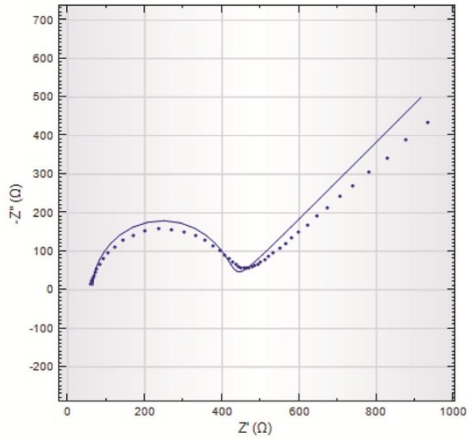

B) GCE/PANI

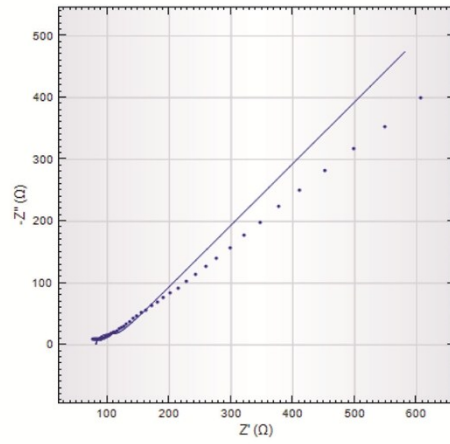

C) GCE/PANI/GLU

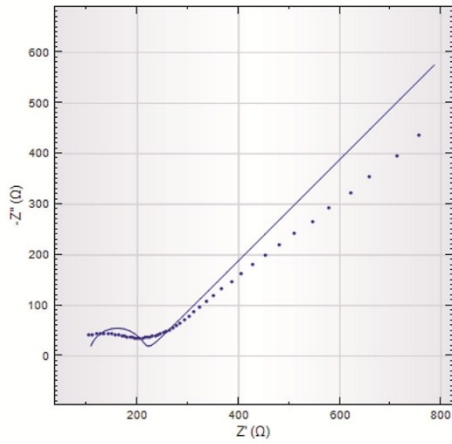

D) GCE/PANI/GLU/UBE2C-Ab

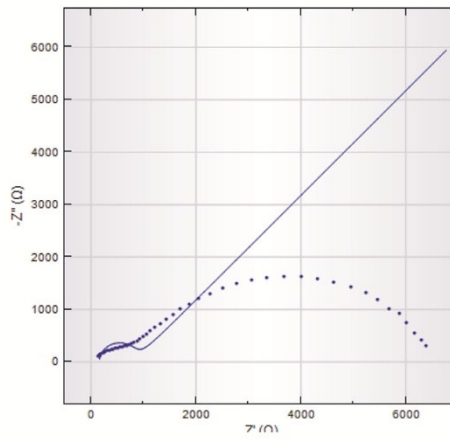

E) GCE/PANI/GLU/UBE2C-Ab/BSA

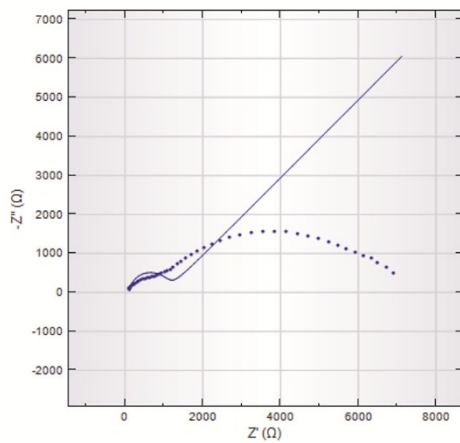

F) Randle's equivalent circuit

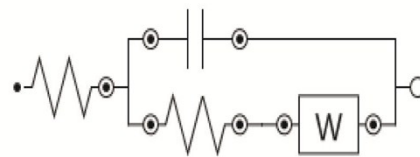

**Figure S3.** Fitting of electrochemical impedance spectra of A) GCE, B) GCE/PANI, C) GCE/PANI/GLU, D) GCE/PANI/GLU/UBE2C-Ab, and E) GCE/PANI/GLU/UBE2C-Ab/BSA into F) Randle's equivalent circuit with NOVA software.

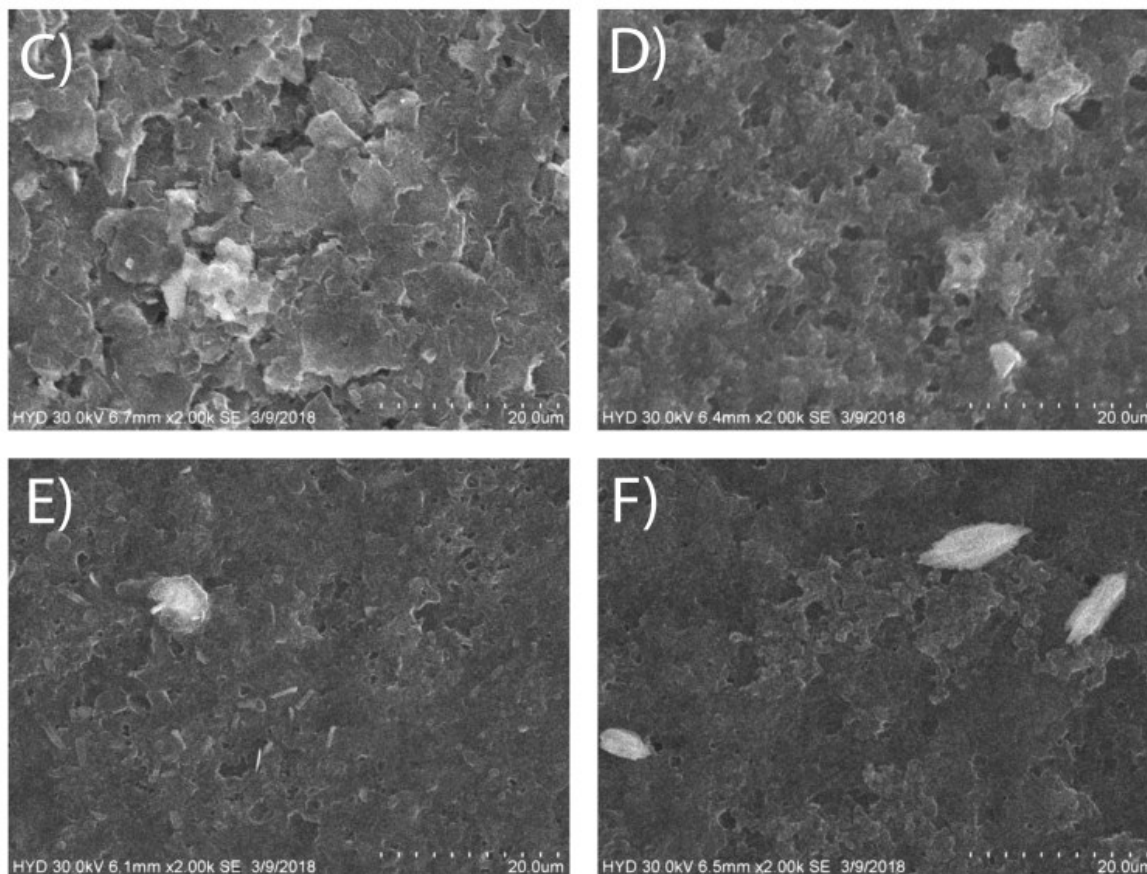

**Figure. S4.** Enlarged SEM images of figure 2C, D, E and F of the main manuscript.

**Table S1:** Parameters of fitting the EIS spectra of different electrodes in Randle's equivalent circuit.

| <b>Electrodes</b>         | <b>Convergence</b> | <b>Number of iterations</b> |
|---------------------------|--------------------|-----------------------------|
| GCE                       | Yes                | 46                          |
| GCE/PANI                  | Yes                | 66                          |
| GCE/PANI/GLU              | Yes                | 58                          |
| GCE/PANI/GLU/UBE2C-Ab     | Yes                | 82                          |
| GCE/PANI/GLU/UBE2C-Ab/BSA | Yes                | 33                          |

\*Convergence: Indication that the data fits the prescribed model, Iterations: the number of iteration used during the fitting of the data.

**Table S2:** Comparison of performance of the fabricated immunosensor with the electrochemical immunosensors reported in the literature

| <b>Biomarker</b>                                | <b>Immobilization support matrix</b>                                               | <b>Linear range</b>                                    | <b>Detection limit</b>    | <b>Ref</b> |
|-------------------------------------------------|------------------------------------------------------------------------------------|--------------------------------------------------------|---------------------------|------------|
| Epidermal Growth Factor Receptor                | Streptavidin coated magnetic beads,                                                | 1- 40 ng mL <sup>-1</sup>                              | 50 pg mL <sup>-1</sup>    | 1          |
| Cytokeratin 19 fragment 21-1 (CYFRA21-1)        | Three-dimensional graphene (3D-G), chitosan (CS) and glutaraldehyde (GA) composite | 0.1 - 150 ng mL <sup>-1</sup>                          | 43 pg mL <sup>-1</sup>    | 2          |
| Vascular endothelial growth factor(VEGF)        | Gold nanoparticles                                                                 | 100-600 pg mL <sup>-1</sup>                            | 100 pg mL <sup>-1</sup>   | 3          |
| IL-13 receptor R $\alpha$ 2 (IL-13R $\alpha$ 2) | Carboxylic acid-modified magnetic microbeads (HOOC-MBs)                            | 3.9-100 ng mL <sup>-1</sup>                            | 1.2 ng mL <sup>-1</sup>   | 4          |
| Prostate Specific Antigen                       | Gold nanoparticle and chitosan                                                     | 0 - 100 ng mL <sup>-1</sup>                            | 7.8 ng mL <sup>-1</sup>   | 5          |
| Interleukin-8 (IL-8)                            | 6-phosphonohexanoic acid                                                           | 0.02 - 3 pg mL <sup>-1</sup>                           | 6 fg mL <sup>-1</sup>     | 6          |
| Ubiquitin-conjugating enzymes 2C (UBE2C)        | Polyaniline                                                                        | 500 pg mL <sup>-1</sup> – 5 $\mu$ g mL <sup>-1</sup> . | 7.907 pg mL <sup>-1</sup> | This work  |

## References

1. H. Ilkhani, M. Sarparast, A. Noori, S. Z. Bathaie and M. F. Mousavia, *Biosens. Bioelectron.*, 2015, **74**, 491-497.
2. Y. Zeng, J. Bao, Y. Zhao, D. Huo, M. Chen, Y. Qi, M. Yang, H. Fa and C. Hou, *Bioelectrochemistry*, 2018, **120**, 183-189.
3. G. I. Kim, K. W. Kim, M. K. Oh and Y. M. Sung, *Biosens. Bioelectron.*, 2010, **25**, 1717-1722.
4. A. Valverde, E. Povedano, V. R. V. Montiel, P. Y. Sedeño, M. G. Asensio, R. Barderas, S. Campuzano and J. M. Pingarrón, *Biosens. Bioelectron.*, 2018, **117**, 766-772.

5. D. Kiziltan, T. Vural, C. Bayram, S. Ozturk, B. Bozdogan, Y. T. Yaman, S. Abaci and E. B. Denkbaz, *Anal. Sci.* 2018, **34**, 789-794.
6. E. B. Aydın and M. K. Sezgintürk, *Anal. Biochem.* 2018, **554**, 44-52.
